# Supplementary material for: Production, Exacerbating Effect, and EV-Mediated Transcription of Hepatic CCN2 in NASH: Implications for Diagnosis and Therapy of NASH Fibrosis
Source: MDPI journal article supplement (doi:10.3390/ijms241612823), 2023-08-15
Supplement: s1 [file s1]

## Supplementary materials

**Table S1. Formulation of control and CDAA-HF diets.**

| Nutrients                  |        | CDAA-HF   | Ctrl diet |
|----------------------------|--------|-----------|-----------|
|                            |        | A06071302 | 2020X     |
| Protein                    | %      | 23.1      | 19.4      |
| Carbohydrate               | %      | 26.3      | 47        |
| Fat                        | %      | 35.7      | 6.5       |
| Fiber                      | %      | 6.6       | 2.7       |
| Methionine                 | %      | 0.1       | 0.5       |
| Choline                    | g/kg   | 0         | 1.2       |
| Calories from Protein      | %      | 18        | 24        |
| Calories from Carbohydrate | %      | 20        | 60        |
| Calories from Fat          | %      | 62        | 16        |
| Energy density             | Kcal/g | 5.2       | 3.1       |

**Table S2. Additional primers used for RT-qPCR.**

| Gene ID                   | Accession No. | Primer                |                          | Length(bp) |
|---------------------------|---------------|-----------------------|--------------------------|------------|
|                           |               | Fwd Seq (5'-3')       | Rev Seq (5'-3')          |            |
| CCN2<br>(human and mouse) |               | AATGCTGCGAGGAGTGGGT   | GGCTCTAATCATAGTTGGGTCT   | 115        |
| mMCP-5/CCL12              | NM_011331     | GTCCTCAGGTATTGGCTGGA  | GGGTCAGCACAGATCTCCTT     | 181        |
| mMIP-1a/CCL3              | NM_011337     | TGAAACCAGCAGCCTTTGCTC | AGGCATTCAAGTTCCAGGTCAGTG | 125        |
| mRANTES/CCL5              | NM_013653     | AGATCTCTGCAGCTGCCCTCA | GGAGCACTTGCTGCTGGTGTAG   | 170        |
| mTIMP-1                   | NM_001044384  | CCTATAGTGCTGGCTGTGGG  | GCAAAGTGACGGCTCTGGTA     | 136        |
| mSREBP1a                  | NM_011480     | GGCCGAGATGTGCGAACT    | TTGTTGATGAGCTGGAGCATGT   | 69         |
| mSREBP1c                  | NM_001358314  | GGAGCCATGGATTGCACATT  | GGCCCGGGAAGTCACTGT       | 70         |
| mFASN                     | NM_007988     | GCTGCGGAACTTCAGGAAAT  | AGAGACGTGTCACTCCTGGACTT  | 84         |
| mSCD1                     | NM_009127     | TTCTTCTCTCACGTGGGTTG  | CGGGCTTGTAAGTACCTCCTC    | 130        |

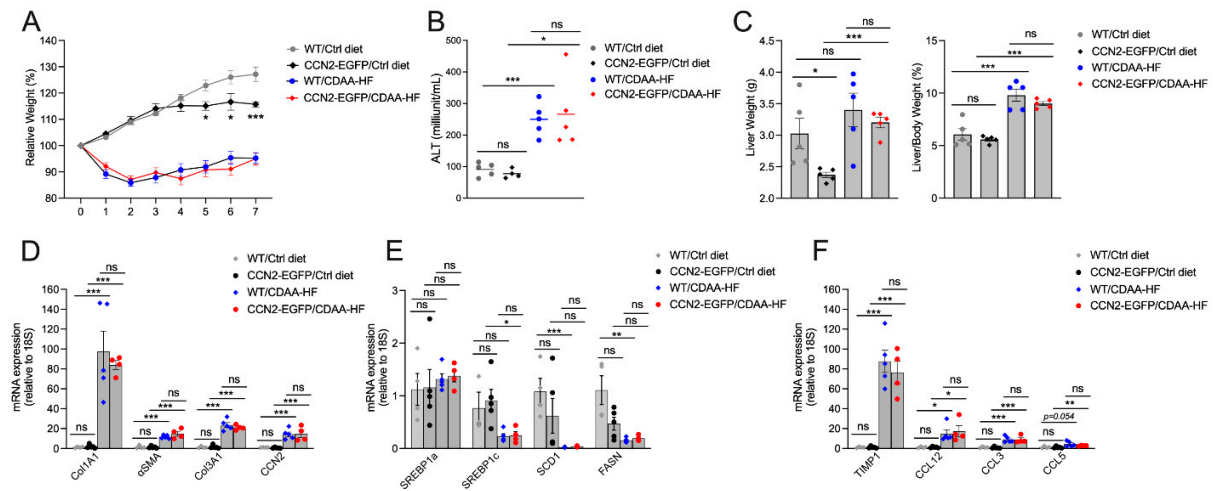

**Figure S1. Swiss Webster WT and CCN2-EGFP TG mice exhibit comparable responses upon CDAA-HF diet feeding.** 8-week-old Swiss Webster WT or CCN2-EGFP TG mice were fed with control or CDAA-HF diet for 7 weeks. **(A)** Body weight was recorded every week. **(B)** Serum ALT levels were measured at the end of 7 weeks. **(C)** Liver weights and liver index (liver/body weight) were measured after the mice were sacrificed. **(D)** Liver fibrotic genes, **(E)** lipid metabolism-related genes, and **(F)** proinflammatory cytokine genes were measured by RT-qPCR. ns, no significance, \* P<0.05, \*\* P<0.01, \*\*\* P<0.005.

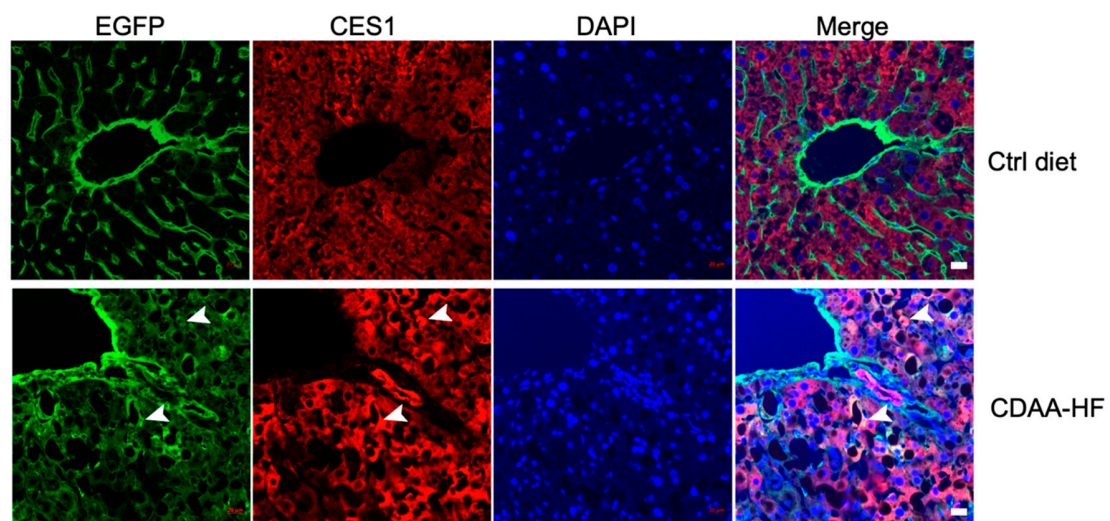

Suppl. Figure 2.

**Figure S2. Hepatic CES1 localization.** Sections of livers from CCN2/EGFP reporter mice fed control diet or CDAA-HF diet for 3 weeks were stained for EGFP and CES1. Arrowheads show areas of co-localization of the two markers. Scale bar=20  $\mu$ m.

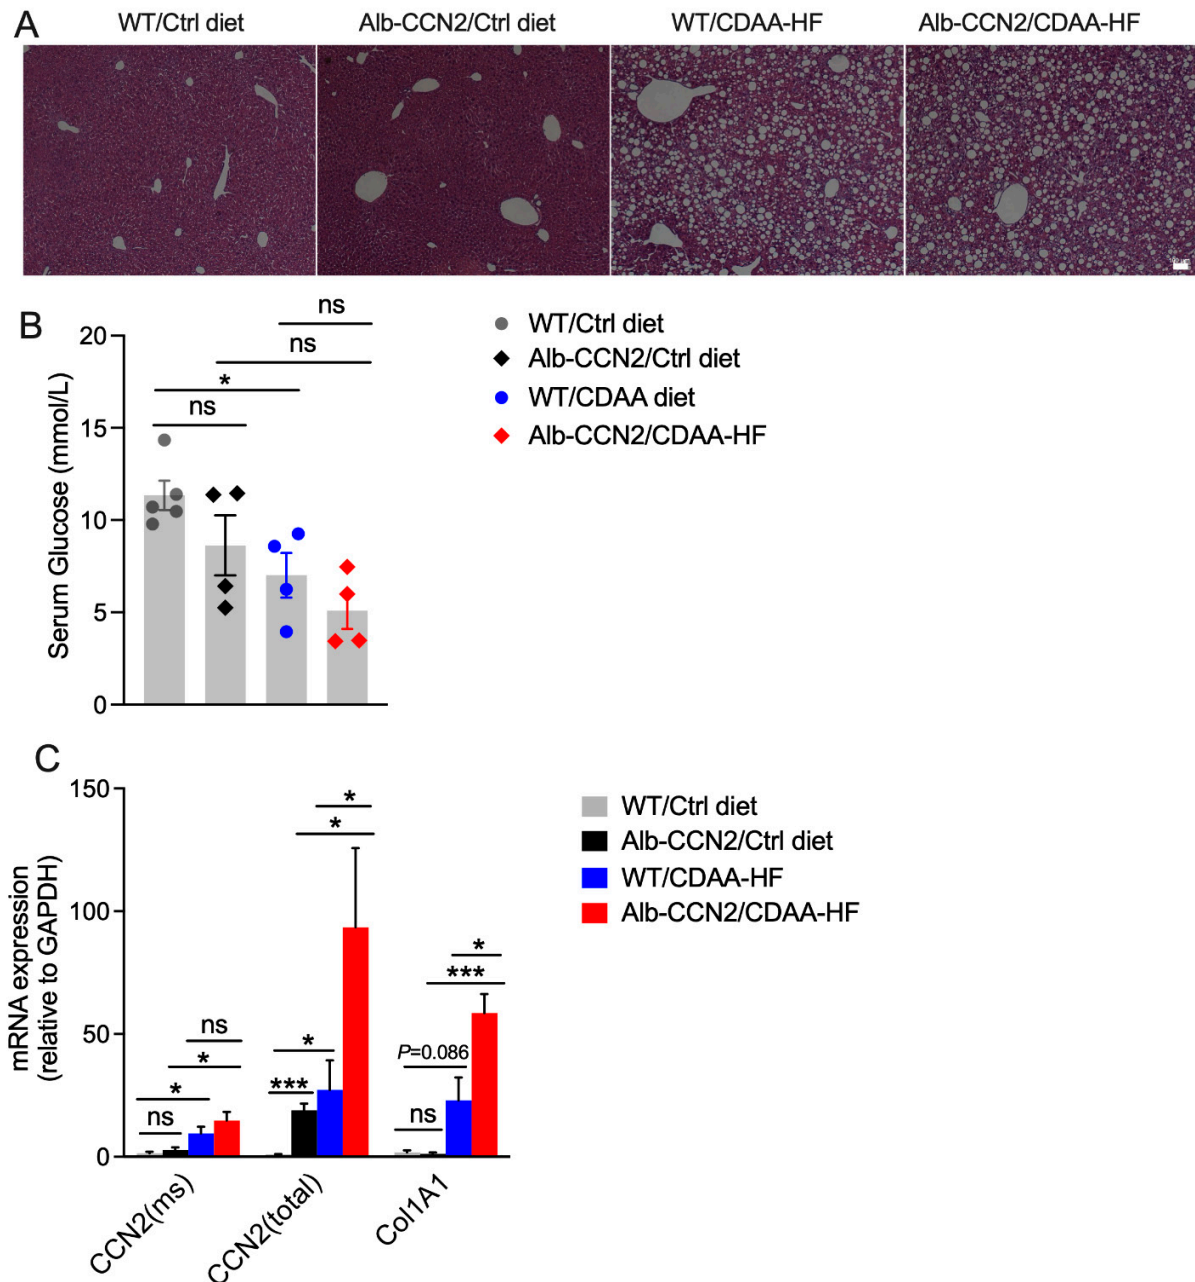

**Figure S3. Balb/c WT or Alb-CCN2 mouse liver histology and fibrotic transcript expression.** 8-week-old Balb/c WT or Alb-CCN2 were fed with control or CDAA-HF diet for 8 weeks. **(A)** Histology assessed by H&E staining (scale bar = 100µm). **(B)** Serum glucose level measured by using the glucose oxidase-peroxidase (GOD-POD) method. **(C)** Liver tissues were used for total RNA isolation and RT-qPCR detection of mouse CCN2, total CCN2 (human and mouse), and mouse Col1A1 transcript. ns, no significance, \* P<0.05, \*\* P<0.01, \*\*\* P<0.005.
